# Supplementary material
Source: PubMed Central journal article supplement (PMC8220457)
Supplement: jama-e216710-s002.pdf [file jama-e216710-s002.pdf]

| <b>Group Name(s): Midwest Pediatric Surgery Consortium</b> |           |                      |                  |                                                           |                                          |                                                         |                                                                                            |
|------------------------------------------------------------|-----------|----------------------|------------------|-----------------------------------------------------------|------------------------------------------|---------------------------------------------------------|--------------------------------------------------------------------------------------------|
| First Name and Middle Initial(s)                           | Last Name | Suffix (eg, Jr, III) | Academic Degrees | Institution                                               | Location (city, state/province, country) | Role or Contribution, eg, chair, principal investigator | Group (if more than 1 Group listed in the byline) and/or Subgroup (eg, Steering Committee) |
| Ronald B.                                                  | Hirschl   |                      | MD               | University of Michigan School of Medicine                 |                                          | Co-investigator                                         |                                                                                            |
| Samir                                                      | Gadepalli |                      | MD, MBA          | University of Michigan School of Medicine                 |                                          | Co-investigator                                         |                                                                                            |
| Michael A.                                                 | Helmrath  |                      | MD               | Cincinnati Children's Hospital and Medical Center         |                                          | Co-investigator                                         |                                                                                            |
| Charles M.                                                 | Leys      |                      | MD               | University of Wisconsin-Madison                           |                                          | Co-investigator                                         |                                                                                            |
| Thomas T.                                                  | Sato      |                      | MD               | Medical College of Wisconsin                              |                                          | Co-investigator                                         |                                                                                            |
| Dave R.                                                    | Lal       |                      | MD               | Medical College of Wisconsin                              |                                          | Co-investigator                                         |                                                                                            |
| Matthew P.                                                 | Landman   |                      | MD               | Indiana University School of Medicine                     |                                          | Co-investigator                                         |                                                                                            |
| Rashmi                                                     | Kabre     |                      | MD               | Ann & Robert H. Lurie Children's Hospital of Chicago      |                                          | Co-investigator                                         |                                                                                            |
| Mary E.                                                    | Fallat    |                      | MD               | University of Louisville School of Medicine               |                                          | Co-investigator                                         |                                                                                            |
| Jennifer N.                                                | Cooper    |                      | PhD              | Nationwide Children's Hospital, The Ohio State University |                                          | Co-investigator                                         |                                                                                            |
